# Supplementary material for: BMP2 and BMP7 play antagonistic roles in feather induction
Source: Oxford University Press journal article supplement (doi:10.1242/dev.018341), 2008-07-17
Supplement: dev018341-sup-018341-tables1.pdf [file dev018341-sup-018341-tables1.pdf]

**Table S1. Parameters for the mathematical model**

| Parameters                                                                                                     | Values                                         |                                |
|----------------------------------------------------------------------------------------------------------------|------------------------------------------------|--------------------------------|
| $N$                                                                                                            | 2.6                                            |                                |
| $Q$                                                                                                            | 0.95                                           |                                |
| $D_u$                                                                                                          | 0.00625                                        |                                |
| $D_v$                                                                                                          | 0.13333                                        |                                |
| $D_n$                                                                                                          | 0.00007                                        |                                |
| $X$                                                                                                            | 0.00008                                        |                                |
| $k_u$                                                                                                          | 15                                             |                                |
| $k_v$                                                                                                          | 35                                             |                                |
| $k_p$                                                                                                          | 0.006                                          |                                |
| $k_d$                                                                                                          | 0.005                                          |                                |
| $c1$                                                                                                           | 100                                            |                                |
| $c2$                                                                                                           | 40                                             |                                |
| $c3$                                                                                                           | 6                                              |                                |
| $c4$                                                                                                           | 4500                                           |                                |
| Functions                                                                                                      | Expression                                     |                                |
| $n_{1,0}(x)$                                                                                                   | $0.25+1.7*\exp(-(x)^2*5)+0.2*\exp(-(x)^2*200)$ | Sequential formation           |
| $n_{2,0}(x)$                                                                                                   | $0.05+2*\exp(-(x)^2*200)$                      | Sequential formation           |
| $n_{1,0}(x)$                                                                                                   | 0                                              | Impact of cell initial density |
| $n_{2,0}(x,y)$                                                                                                 | q+fluctuations                                 | Impact of cell initial density |
| Presented are the various constants and parameters used in the numerical resolution of the mathematical model. |                                                |                                |
